# Supplementary material for: Expression of Toll-like receptors (TLRs) in the lungs of an experimental sepsis mouse model
Source: PubMed Central journal article supplement (PMC5685586; doi:10.1371/journal.pone.0188050), 2017-11-14
Supplement: pone.0188050.s001.pdf [file pone.0188050.s001.pdf]

| TLR's<br>Primer               | TLR-2                              | TLR-3                              | TLR-4                               | TLR-7                              |
|-------------------------------|------------------------------------|------------------------------------|-------------------------------------|------------------------------------|
| LEFT                          | 5'-<br>tgggctgacttctctcaatg<br>-3' | 5'-<br>ctgggtctgggaacatttct<br>-3' | 5'-<br>ggaacaaacagcctgagaca<br>-3'  | 5'-<br>atacctggccactgatgtga-<br>3' |
| TM                            | 59,0                               | 59,0                               | 58,9                                | 59,0                               |
| RIGHT                         | 5'-<br>ttcatcggtgagctgacttc<br>-3' | 5'-<br>ttgctgaactgcgtgatgta<br>-3' | 5'-<br>ttgagactgggtcaagccaag-<br>3' | 5'-<br>gactccatggattgcagatg-<br>3' |
| TM                            | 59,0                               | 59,0                               | 59,0                                | 59,0                               |
| Product<br>Size               | 243                                | 211                                | 233                                 | 249                                |
| NCBI<br>reference<br>sequence | NM 011905                          | NM 126166                          | NM 021297.2                         | NM 133211.3                        |

**Supplemental Table 1.** Primers that were used for PCR
