# Supplementary material for: Expression of Toll-like receptors (TLRs) in the lungs of an experimental sepsis mouse model
Source: PubMed Central journal article supplement (PMC5685586; doi:10.1371/journal.pone.0188050), 2017-11-14
Supplement: pone.0188050.s002.pdf [file pone.0188050.s002.pdf]

| Time points         |                |                        |                           |
|---------------------|----------------|------------------------|---------------------------|
| Groups              | 24h            | 48h                    | 72h                       |
| <b><i>TLR-2</i></b> |                |                        |                           |
| Control             | - <sup>a</sup> | - <sup>a</sup>         | - <sup>a</sup>            |
| Septic              | 0.33±0.21      | 1.76±0.5 <sup>b</sup>  | 3.36±0.34 <sup>c, d</sup> |
| <b><i>TLR-3</i></b> |                |                        |                           |
| Control             | - <sup>a</sup> | - <sup>a</sup>         | - <sup>a</sup>            |
| Septic              | 0.16±0.1       | 1.27±0.33 <sup>b</sup> | 2.24±0.19 <sup>c, d</sup> |
| <b><i>TLR-4</i></b> |                |                        |                           |
| Control             | - <sup>a</sup> | - <sup>a</sup>         | - <sup>a</sup>            |
| Septic              | 0.26±0.25      | 0.58±0.28 <sup>b</sup> | 1.11±0.04 <sup>c, d</sup> |
| <b><i>TLR-7</i></b> |                |                        |                           |
| Control             | - <sup>a</sup> | - <sup>a</sup>         | - <sup>a</sup>            |
| Septic              | 0.33±0.17      | 1.52±0.4 <sup>b</sup>  | 1.86±0.64 <sup>d</sup>    |

---

**Supplemental table 2.** Changes of TLR-2, 3, 4 and 7 in immunofluorescence analysis at the experimental time points. Values are expressed as the mean±SD. Statistical significances ( $p<0.05$ ) between the groups at the same time point are indicated as follows: a: Control (C) vs Septic (S); b: 24S vs 48S; c: 48S vs 72S; d: 24S vs 72S.
