# Supplementary material for: Expression of Toll-like receptors (TLRs) in the lungs of an experimental sepsis mouse model
Source: PubMed Central journal article supplement (PMC5685586; doi:10.1371/journal.pone.0188050), 2017-11-14
Supplement: pone.0188050.s003.pdf [file pone.0188050.s003.pdf]

| Time points         |                |                         |                            |
|---------------------|----------------|-------------------------|----------------------------|
| Groups              | 24h            | 48h                     | 72h                        |
| <b><i>TLR-2</i></b> |                |                         |                            |
| Control             | - <sup>a</sup> | - <sup>a</sup>          | - <sup>a</sup>             |
| Septic              | 23.20±5.76     | 62.9±0.55 <sup>b</sup>  | 110.7±0.82 <sup>c, d</sup> |
| <b><i>TLR-3</i></b> |                |                         |                            |
| Control             | - <sup>a</sup> | - <sup>a</sup>          | - <sup>a</sup>             |
| Septic              | 2.85±0.36      | 5.08±0.77 <sup>b</sup>  | 17.58±0.37 <sup>c, d</sup> |
| <b><i>TLR-4</i></b> |                |                         |                            |
| Control             | - <sup>a</sup> | - <sup>a</sup>          | - <sup>a</sup>             |
| Septic              | 21.64±0.39     | 76.16±1.15 <sup>b</sup> | 112.2±1.78 <sup>c, d</sup> |
| <b><i>TLR-7</i></b> |                |                         |                            |
| Control             | - <sup>a</sup> | - <sup>a</sup>          | - <sup>a</sup>             |
| Septic              | 5.64±0.54      | 45.93±0.82 <sup>b</sup> | 50.71±0.5 <sup>c, d</sup>  |

---

**Supplemental table 3.** PCR showing changes of TLR 2, 3, 4 and 7 in lung tissues at the experimental time points. Values are expressed as the mean±SD. Statistical significances ( $p<0.05$ ) between the groups at the same time point are indicated as follows: a Control (C) vs Septic (S); b: 24S vs 48S; c: 48S vs 72S; d: 24S vs 72S.
