# Supplementary material for: Expression of Toll-like receptors (TLRs) in the lungs of an experimental sepsis mouse model
Source: PubMed Central journal article supplement (PMC5685586; doi:10.1371/journal.pone.0188050), 2017-11-14
Supplement: pone.0188050.s004.pdf [file pone.0188050.s004.pdf]

| Time points         |                |                         |                            |
|---------------------|----------------|-------------------------|----------------------------|
| Groups              | 24h            | 48h                     | 72h                        |
| <b><i>TLR-2</i></b> |                |                         |                            |
| Control             | -              | - <sup>a</sup>          | - <sup>a</sup>             |
| Septic              | 4.86±0.53      | 15.79±0.49 <sup>b</sup> | 79.76±6.38 <sup>c, d</sup> |
| <b><i>TLR-3</i></b> |                |                         |                            |
| Control             | -              | - <sup>a</sup>          | - <sup>a</sup>             |
| Septic              | 4.12±0.13      | 7.75±0.3                | 31±4.7 <sup>c, d</sup>     |
| <b><i>TLR-4</i></b> |                |                         |                            |
| Control             | - <sup>a</sup> | - <sup>a</sup>          | - <sup>a</sup>             |
| Septic              | 7.16±0.86      | 15.06±0.58 <sup>b</sup> | 75.19±2.31 <sup>c, d</sup> |
| <b><i>TLR-7</i></b> |                |                         |                            |
| Control             | - <sup>a</sup> | - <sup>a</sup>          | - <sup>a</sup>             |
| Septic              | 22.5±1.1       | 32.8±0.25 <sup>b</sup>  | 55.63±4.87 <sup>c, d</sup> |

---

**Supplemental table 4.** PCR showing changes of TLR 2, 3, 4 and 7 in the intestine at the experimental time points. Values are expressed as the mean±SD. Statistical significances ( $p<0.05$ ) between the groups at the same time point are indicated as follows: a Control (C) vs Septic (S); b: 24S vs 48S; c: 48S vs 72S; d: 24S vs 72S.
