# Supplementary material for: Expression of Toll-like receptors (TLRs) in the lungs of an experimental sepsis mouse model
Source: PubMed Central journal article supplement (PMC5685586; doi:10.1371/journal.pone.0188050), 2017-11-14
Supplement: pone.0188050.s005.pdf [file pone.0188050.s005.pdf]

| Time points | 24h                  | 48h                  | 72h                  |
|-------------|----------------------|----------------------|----------------------|
| <i>TLR2</i> | 0,0054 <sup>*</sup>  | <0.0001 <sup>*</sup> | 0,0011 <sup>*</sup>  |
| <i>TLR3</i> | 0,0047 <sup>§</sup>  | 0,0051 <sup>§</sup>  | 0,0078 <sup>§</sup>  |
| <i>TLR4</i> | <0.0001 <sup>*</sup> | <0.0001 <sup>*</sup> | <0.0001 <sup>*</sup> |
| <i>TLR7</i> | <0.0001 <sup>§</sup> | <0.0001 <sup>*</sup> | 0,1573               |

**Supplemental table 5** Differential expression of all TLRs in the intestine and lung among time-adjusted sepsis groups. The alpha level of statistical significance was set at 0.05.

<sup>\*</sup>p-value denoting higher expression in the lung compared to the intestine

<sup>§</sup>p-value denoting higher expression in the intestine compared to the lung
