# Supplementary material for: Expression of Toll-like receptors (TLRs) in the lungs of an experimental sepsis mouse model
Source: PubMed Central journal article supplement (PMC5685586; doi:10.1371/journal.pone.0188050), 2017-11-14
Supplement: pone.0188050.s007.pdf [file pone.0188050.s007.pdf]

Supplemental Table 7 Minimal data set-Blood and biochemical results

|      |       |      |       |        |       |      |
|------|-------|------|-------|--------|-------|------|
| WBC  | 24C   | 24S  | 48C   | 48S    | 72C   | 72S  |
| N=3  | 7,3   | 2,6  | 9,5   | 3,3    | 9,7   | 5,9  |
|      | 5,71  | 1,6  | 8,69  | 3,4    | 8,5   | 5,56 |
|      | 6,8   | 2,4  | 4,49  | 3,9    | 5,85  | 5,1  |
| RBC  | 24C   | 24S  | 48C   | 48S    | 72C   | 72S  |
| N=3  | 5,69  | 4,65 | 9,96  | 6,25   | 8,44  | 1,69 |
|      | 5,87  | 5,12 | 7,12  | 7,89   | 9,28  | 1,85 |
|      | 6,59  | 6,58 | 7     | 5,2    | 7,02  | 1,69 |
| LY   | 24C   | 24S  | 48C   | 48S    | 72C   | 72S  |
| N=3  | 71    | 59   | 81    | 52     | 68    | 32   |
|      | 68    | 58   | 68    | 55     | 86    | 38   |
|      | 79    | 65   | 78    | 56     | 74    | 32   |
| MO   | 24C   | 24S  | 48C   | 48S    | 72C   | 72S  |
| N=3  | 2     | 2    | 2     | 5      | 2     | 7    |
|      | 2     | 5    | 5     | 5      | 6     | 8    |
|      | 3     | 6    | 6     | 6      | 3     | 7    |
| CR   | 24C   | 24S  | 48C   | 48S    | 72C   | 72S  |
| N=3  | 0,39  | 1,66 | 0,26  | 2,28   | 0,36  | 5,18 |
|      | 0,12  | 1,34 | 0,29  | 2,92   | 0,54  | 3,96 |
|      | 0,56  | 1,76 | 0,64  | 2,56   | 0,12  | 3,25 |
| IL6  | 24C   | 24S  | 48C   | 48S    | 72C   | 72S  |
| N=3  | 10,1  | 1120 | 11,25 | 2152   | 19,45 | 2598 |
|      | 11    | 1238 | 10,36 | 3651   | 12,85 | 2895 |
|      | 12,36 | 1450 | 10,84 | 2436   | 13,25 | 2259 |
| IL10 | 24C   | 24S  | 48C   | 48S    | 72C   | 72S  |
| N=3  | 7,15  | 104  | 9,58  | 150,25 | 9,25  | 495  |
|      | 7,1   | 86   | 7,85  | 221    | 8,47  | 589  |
|      | 6,23  | 85   | 6,58  | 188,56 | 6,58  | 1789 |
