# Supplementary material for: Expression of Toll-like receptors (TLRs) in the lungs of an experimental sepsis mouse model
Source: PubMed Central journal article supplement (PMC5685586; doi:10.1371/journal.pone.0188050), 2017-11-14
Supplement: pone.0188050.s008.pdf [file pone.0188050.s008.pdf]

Supplemental Table 8 Minimal data set- IHC for septic groups

AREA %

|      |     |      |      |      |
|------|-----|------|------|------|
| TLR2 | N=3 | S24  | S48  | S72  |
| IHC  |     | 0,28 | 1,45 | 3,11 |
|      |     | 0,12 | 1,69 | 3,79 |
|      |     | 0,34 | 1,14 | 3,8  |
| TLR3 | N=3 | S24  | S48  | S72  |
| IHC  |     | 0,24 | 1,02 | 2,1  |
|      |     | 0,28 | 1,9  | 2,14 |
|      |     | 0,21 | 1,09 | 2,62 |
| TLR4 | N=3 | S24  | S48  | S72  |
| IHC  |     | 0,06 | 0,64 | 1,15 |
|      |     | 0,05 | 0,68 | 1,05 |
|      |     | 0,37 | 0,22 | 1,15 |
| TLR7 | N=3 | S24  | S48  | S72  |
| IHC  |     | 0,64 | 1,69 | 2,63 |
|      |     | 0,29 | 1,09 | 2,12 |
|      |     | 0,25 | 1,5  | 1,12 |
