# Supplementary material for: Expression of Toll-like receptors (TLRs) in the lungs of an experimental sepsis mouse model
Source: PubMed Central journal article supplement (PMC5685586; doi:10.1371/journal.pone.0188050), 2017-11-14
Supplement: pone.0188050.s009.pdf [file pone.0188050.s009.pdf]

Supplemental Table 9 Minimal data set-PCR for septic groups

|      |       |       |        |
|------|-------|-------|--------|
| TLR2 | S24   | S48   | S72    |
| N=3  | 19,62 | 62,35 | 110    |
|      | 19,24 | 61,2  | 86,3   |
|      | 23,26 | 65,3  | 99,5   |
| TLR3 | S24   | S48   | S72    |
| N=3  | 3,14  | 5,23  | 17,52  |
|      | 2,12  | 4,02  | 16,23  |
|      | 2,09  | 5,26  | 14,26  |
| TLR4 | S24   | S48   | S72    |
| N=3  | 21,36 | 77,45 | 110,25 |
|      | 19,56 | 42,36 | 96,32  |
|      | 20,47 | 71,56 | 102,89 |
| TLR7 | S24   | S48   | S72    |
| N=3  | 5,26  | 45,69 | 50,26  |
|      | 6,02  | 40,12 | 48,26  |
|      | 5,12  | 39,63 | 46,2   |
